# Supplementary material for: Likelihood-based deconvolution of bulk gene expression data using single-cell references
Source: PubMed Central journal article supplement — Genome Res. 2021 Oct;31(10):1794–806. doi: 10.1101/gr.272344.120 (PMC8494215; doi:10.1101/gr.272344.120), 2021-10
Supplement: supp_gr.272344.120_Supplemental_Material.pdf [file supp_gr.272344.120_Supplemental_Material.pdf]

# Supplemental Material

## **A likelihood-based deconvolution of bulk gene expression data using single-cell references**

Dan D. Erdmann-Pham\*, Jonathan Fischer\*, Justin Hong, Yun S. Song

June 22, 2021

This file contains:

- Supplementary Text S1
- Supplementary Tables S1–S4
- Supplementary Figures S1–S12

## S1 Supplementary Text

### S1.1 Robustness against cell type misspecification

In practice, complications to the generic deconvolution problem may arise. For example, the scRNA-seq reference data may lack one or more cell types found in the bulk sample, or may even contain extra ones. Such problems are more likely to occur when performing cross-experimental or cross-subject deconvolutions, as we typically must. It is thus important to examine how algorithms perform in these situations. We further recognize the necessity to demonstrate robustness to misspecification for a model-based approach like RNA-Sieve. To do so, we selected the kidney, limb muscle, liver, and marrow due to their representative ranges of cell type number and dissimilarities, and considered all possible configurations containing one extra or missing cell type in the single-cell references. When the reference contains too many cell types, deconvolution schemes should infer proportions near zero for these extra cell types. We found that to be the case with RNA-Sieve (Figures S4 and S5) as long as the extra reference cell type is sufficiently distinct from the other cell types present in the reference. When cell types are highly similar, inferred proportions may be shared among them and might not change substantially upon removal of one of these cell types from the bulk. Meanwhile, when a cell type present in the bulk is absent from the reference, the more likely of these two scenarios, the deconvolution problem becomes overdetermined. Ideally, deconvolution algorithms would move the weight of the removed cell type to those most similar to it. Our empirical results (Figures S6 and S7) indicate that RNA-Sieve tends to do precisely this. In some cases, this means mass transfer to one single cell type, while in others the weight is shared among multiple. This result suggests that in the case of misspecification, RNA-Sieve will still achieve sensible solutions as long as sufficiently representative cell types are captured in the reference set. We note that given the generative nature of our model, a hypothesis test to detect missing cell types is, as opposed to existing methods, within the capabilities of our framework (see Discussion in main manuscript).

### S1.2 Further validation

We analyzed samples from the pancreatic islets region of the human pancreas where ground-truth proportions were not available. This region has previously been used for validation in the absence of ground-truth proportions because of prior knowledge of the general ranges of constituent cell types. Moreover, the well-known negative relationship between beta cell proportions and hemoglobin A1c (Hb1Ac) levels allows us to test whether different deconvolution approaches can recapitulate this relationship. As shown in Figure S8, RNA-Sieve is among the methods which successfully identify the expected negative correlation. As ground-truth values were not available for these data, it is impossible to ascertain precisely how methods performed, though it appears each method’s average inferred beta cell proportions are below the expected  $\sim 50\%$ . Nevertheless, successful recovery of the expected association between beta cell proportions and Hb1Ac levels serves as a useful benchmark. Given the necessity to demonstrate robust performance across a range of tissues and cell type groups, we feel this result provides important support to RNA-Sieve’s strong performance in the cell line and PBMC deconvolution tasks analyzed in the main text.

### S1.3 Comparison of runtimes

We found that all considered deconvolution algorithms could be successfully run in no more than a few hours on a laptop computer for the data sets we considered. RNA-Sieve runtimes ranged from 15-40 minutes, as did those of Scaden. Because of the straightforward manner in which we

construct the signature and variance matrices for cell types, RNA-Sieve’s runtime is not sensitive to the size of the scRNA-seq reference. This is not the case for DWLS, whose runtime we found grew quickly with the size of the data set due to the model fitting involved in its signature gene inference procedure. For most cases, DWLS runtimes were also in the 15-40 minute range, but for some of the larger single-cell reference panels with many cell types, the runtime could extend to a few hours. CIBERSORTx typically ran in 5-15 minutes. The remaining methods (SCDC, MuSiC, Bisque, and NNLS) were quite fast, with runtimes of no more than a couple of minutes, though SCDC and MuSiC may take a few extra minutes if their tree-based deconvolution modes are used.

### S1.4 A Note on $n$

One of the parameters inferred by our model is  $n$ , the number of cells in the bulk sample. This parameter is accurate and physically meaningful in within-protocol deconvolutions, or cross-protocol experiments where relative amplification factors are explicitly known. However, it loses interpretability when the relative scales across protocols are unclear, and so we sought to verify that both our inferred proportions and computed confidence intervals are robust even in such situations. Numerical experiments in which we re-scaled the bulk samples to artificially manipulate the inference of  $n$  showed no degradation in performance over a wide range of values, providing additional support beyond the observed high-quality results in both *in silico* and real bulk cross-protocol deconvolutions (Figure S12). Moreover, theoretical computations suggest a fairly weak dependence of confidence intervals on  $n$ , which are instead driven primarily by the total number of genes available for deconvolution.

### S1.5 Cell filtering and normalization

Due to the well-known influence of technical variability in scRNA-seq data, we suggest that users of RNA-Sieve perform their own quality control filtering of cells and genes prior to running our software in addition to their preferred normalization. Given the potential complexity of these patterns in general, we feel that manual cleaning is more reliable than automated procedures. Nonetheless, we implement a simple, largely optional, cell filtering and normalization scheme to ensure the accuracy of results when the user has chosen not to perform their own quality control. Our procedure attempts to do the following:

1. Remove low-quality cells with anomalously low or high library sizes ( $\geq 3$  median absolute deviations away from the median value of total number of reads per cell in each cell type)
2. Normalize read counts in cells (re-scale reads so that all cells have the median number of reads from across all cells);
3. Identify and remove cells which may be mislabeled or are simply extremely different from other cells with the same cell type label ( $\geq 3$  median absolute deviations away from the median value of inter-cellular pairwise distances in each cell type)
4. Identify and retain genes which are expressed sufficiently often ( $\geq 20\%$  non-zero measurements in at least one cell type).

We note that the first three steps are optional whereas step 4 is necessary to remove lowly expressed genes, whose presence may result in poor optimization outcomes due to creating biologically implausible expressions (a non-zero bulk expression can never be realized as a convex combination of zero or almost zero, low variance, single cell expressions).

## S1.6 Algorithmic design choices

While the Python and Mathematica implementations differ slightly, they both agree on the following fundamental design choices:

1. Instead of maximizing  $\mathbb{P}_{M,S}^{\alpha,n,c}$ , we minimize  $-\log \mathbb{P}_{M,S}^{\alpha,n,c}$ , rendering lines 5 and 6 of Algorithm 1 as quadratic programs which can be solved efficiently.
2. Lines 7 and 13 of Algorithm 1 can be solved explicitly by differentiating equation (10) and finding the zeros of the resulting algebraic fractions in  $n$ . Thus, these steps do not require any explicit optimization scheme.
3. The optimizations in lines 11 through 13 proceed via gradient descent (or a variation thereof), and so could possibly require long runtimes. However, the coarser maximization (minimization, cf. item 1) in lines 5–7 typically improves the objective function to such an extent that only two or three more iterations are required. Moreover, both sets of optimizations are amenable to parallelization.
4. Algorithm 1 straightforwardly generalizes to the setting of jointly inferring mixture proportions in an arbitrary number  $N$  of bulk samples (cf. the remarks around equation (11)). Both of our implementations support this generalized deconvolution.

Lastly, we note that although the alternating optimization in lines 5–7 is not guaranteed to converge, the second round of maximization in lines 11–13 is a proper coordinate descent and is therefore guaranteed to reach a local minimum.

## S2 Supplementary Tables

(A) Smart-seq2 reference and 10x Chromium pseudobulk

|                 | RNA-Sieve    | Bisque       | CIBERSORTx   | DWLS  | MuSiC | NNLS  | Scaden       | SCDC         |
|-----------------|--------------|--------------|--------------|-------|-------|-------|--------------|--------------|
| Bladder         | 0.081        | <b>0.047</b> | 0.082        | 0.072 | 0.106 | 0.378 | 0.099        | 0.113        |
| Kidney          | 0.095        | 0.109        | <b>0.028</b> | 0.055 | 0.110 | 0.249 | 0.062        | 0.083        |
| Large intestine | 0.076        | 0.082        | 0.300        | 0.123 | 0.108 | 0.226 | <b>0.042</b> | 0.136        |
| Limb muscle     | 0.199        | 0.108        | 0.037        | 0.039 | 0.199 | 0.310 | <b>0.030</b> | 0.144        |
| Liver           | 0.137        | 0.129        | 0.030        | 0.054 | 0.139 | 0.340 | 0.076        | <b>0.027</b> |
| Lung            | 0.056        | 0.078        | 0.071        | 0.064 | 0.056 | 0.149 | 0.057        | <b>0.029</b> |
| Mammary gland   | <b>0.020</b> | 0.258        | 0.072        | 0.029 | 0.047 | 0.371 | 0.083        | 0.058        |
| Marrow          | 0.061        | 0.101        | 0.071        | 0.073 | 0.070 | 0.166 | 0.072        | <b>0.049</b> |
| Pancreas        | <b>0.011</b> | 0.029        | 0.050        | 0.030 | 0.067 | 0.130 | 0.059        | 0.067        |
| Skin            | <b>0.019</b> | 0.270        | 0.048        | 0.123 | 0.098 | 0.462 | 0.182        | 0.128        |
| Thymus          | <b>0.017</b> | 0.050        | 0.098        | 0.331 | 0.127 | 0.482 | 0.030        | 0.120        |
| Tongue          | <b>0.016</b> | 0.289        | 0.068        | 0.293 | 0.047 | 0.448 | 0.217        | 0.017        |
| Trachea         | 0.108        | <b>0.097</b> | 0.166        | 0.165 | 0.142 | 0.252 | 0.110        | 0.154        |

(B) 10x Chromium reference and Smart-seq2 pseudobulk

|                 | RNA-Sieve    | Bisque | CIBERSORTx   | DWLS         | MuSiC        | NNLS  | Scaden | SCDC         |
|-----------------|--------------|--------|--------------|--------------|--------------|-------|--------|--------------|
| Bladder         | <b>0.002</b> | 0.066  | 0.059        | 0.085        | 0.156        | 0.044 | 0.167  | 0.261        |
| Kidney          | 0.082        | 0.045  | 0.036        | <b>0.028</b> | 0.113        | 0.173 | 0.044  | 0.046        |
| Large intestine | 0.117        | 0.158  | 0.089        | 0.152        | 0.186        | 0.448 | 0.066  | <b>0.007</b> |
| Limb muscle     | 0.137        | 0.132  | 0.037        | <b>0.013</b> | 0.122        | 0.142 | 0.102  | 0.177        |
| Liver           | 0.107        | 0.056  | <b>0.032</b> | 0.050        | 0.126        | 0.164 | 0.052  | 0.070        |
| Lung            | 0.092        | 0.069  | 0.029        | <b>0.021</b> | 0.130        | 0.153 | 0.074  | 0.045        |
| Mammary gland   | <b>0.009</b> | 0.244  | 0.062        | 0.013        | 0.160        | 0.228 | 0.196  | 0.157        |
| Marrow          | <b>0.070</b> | 0.110  | 0.124        | 0.097        | 0.113        | 0.147 | 0.111  | 0.121        |
| Pancreas        | 0.121        | 0.085  | 0.137        | 0.054        | <b>0.023</b> | 0.117 | 0.111  | 0.173        |
| Skin            | <b>0.037</b> | 0.191  | 0.162        | 0.050        | 0.168        | 0.676 | 0.109  | 0.192        |
| Thymus          | <b>0.002</b> | 0.110  | 0.114        | 0.208        | 0.298        | 0.317 | 0.036  | 0.275        |
| Tongue          | <b>0.006</b> | 0.254  | 0.022        | 0.143        | 0.672        | 0.672 | 0.191  | 0.672        |
| Trachea         | 0.092        | 0.098  | <b>0.067</b> | 0.080        | 0.166        | 0.151 | 0.105  | 0.153        |

Table S1: **Deconvolution errors for different algorithms in pseudobulk experiments.** Deconvolutions were performed using the specified methods in thirteen organs using both Smart-seq2 and 10x Chromium data from the *Tabula Muris Senis* experiment. Presented errors show the  $L_1$  distance between the ground truth and inferred values divided by the number of present cell types. These values correspond to Table 1 and Figure 2 of the main text.

| <b>Organs</b>   | <b># cell types</b> | <b>Cell types</b>                                                                                                                                                                                                                                            |
|-----------------|---------------------|--------------------------------------------------------------------------------------------------------------------------------------------------------------------------------------------------------------------------------------------------------------|
| Bladder         | 2                   | bladder cell, bladder urothelial cell                                                                                                                                                                                                                        |
| Kidney          | 7                   | B cell, epithelial cell of proximal tubule, fenestrated cell, kidney collecting duct principal cell, kidney loop of Henle ascending limb epithelial cell, macrophage, T cell                                                                                 |
| Large intestine | 3                   | enterocyte of epithelium of large intestine, epithelial cell of large intestine, intestinal crypt stem cell                                                                                                                                                  |
| Limb muscle     | 6                   | B cell, endothelial cell, macrophage, mesenchymal stem cell, skeletal muscle satellite cell, T cell                                                                                                                                                          |
| Liver           | 5                   | B cell, endothelial cell of hepatic sinusoid, hepatocyte, Kupfer cell, myeloid leukocyte                                                                                                                                                                     |
| Lung            | 12                  | adventitial cell, B cell, bronchial smooth muscle cell, CD4+ $\alpha\beta$ T cell, CD8+ $\alpha\beta$ T cell, classical monocyte, fibroblast of lung, myeloid dendritic cell, neutrophil, natural killer cell, non-classical monocyte, vein endothelial cell |
| Mammary gland   | 3                   | basal cell, luminal epithelial cell of mammary gland, stromal cell                                                                                                                                                                                           |
| Marrow          | 9                   | granulocyte, granulocytopoietic cell, immature B cell, late pro-B cell, macrophage, megakaryocyte-erythroid progenitor cell, naive B cell, precursor B cell, promonocyte                                                                                     |
| Pancreas        | 3                   | pancreatic A cell, pancreatic B cell, pancreatic D cell                                                                                                                                                                                                      |
| Skin            | 2                   | basal cell of epidermis, epidermal cell                                                                                                                                                                                                                      |
| Thymus          | 2                   | DN4 thymocyte, thymocyte                                                                                                                                                                                                                                     |
| Tongue          | 2                   | basal cell of epidermis, keratinocyte                                                                                                                                                                                                                        |
| Trachea         | 5                   | basal epithelial cell of tracheobronchial tree, chondrocyte, endothelial cell, fibroblast, macrophage                                                                                                                                                        |

Table S2: **Cell types for each organ in pseudobulk experiments.** These were the cell types used in pseudobulk experiments with the *Tabula Muris Senis* data. The order in which they are listed here matches their order in any figures based off of these experiments.

| <b>Data attribute</b>               | <b>RNA-Sieve requirements</b>                                                                                                                                                                                                                                                                                                                                                                                                                                                                                                                                                                                                                                                                                                               |
|-------------------------------------|---------------------------------------------------------------------------------------------------------------------------------------------------------------------------------------------------------------------------------------------------------------------------------------------------------------------------------------------------------------------------------------------------------------------------------------------------------------------------------------------------------------------------------------------------------------------------------------------------------------------------------------------------------------------------------------------------------------------------------------------|
| Cell counts                         | The asymptotic analysis of RNA-Sieve relies primarily on the Central Limit Theorem, and so any cell counts that allow its application are sufficient. Because most gene expression counts reasonably follow Poisson or negative binomial distributions, having at least 30 cells is typically sufficient for accurate approximations. Unusually skewed distributions may necessitate $\sim 100$ -400 cells.                                                                                                                                                                                                                                                                                                                                 |
| Number of reference individuals     | RNA-Sieve does not rely on the presence of multiple individuals in the reference and performs inference reliably with any number of individuals. If multiple reference individuals are available, RNA-Sieve simply operates on the pooled mean and variance matrices. We currently do not recommend mixing data from different experimental protocols in the reference.                                                                                                                                                                                                                                                                                                                                                                     |
| Reference and bulk protocols        | In the case of differences in the data due to protocol mismatch in the scRNA-seq reference and bulk samples, potential nonlinear distributional shifts may need to be accounted for (linear differences are absorbed into the inference of $n$ , see the A NOTE ON $n$ section in the main manuscript). Empirically, we found such the largest driver of such nonlinear shifts to be differences in the rates of null inflation. In some cases, this is compensated for by increased sequencing depth. Thus, deeply sequenced libraries can be analyzed without further correction, while sparser data sets may benefit substantially from the filtering steps detailed in the DATA PREPROCESSING PROCEDURE section of the main manuscript. |
| Jointly deconvolving multiple bulks | If each cell type is expressed similarly across bulk samples (i.e., cells are not differentially expressed in different bulk samples), joint deconvolution is recommended as it increases statistical power regardless of any heterogeneity in mixture proportions. If cell types display differential expression (due to biological or technical reasons), model misspecification becomes a concern and inference results may depend on the nature of the misspecification. In such cases, it is advisable to deconvolve different bulk samples separately.                                                                                                                                                                                |

Table S3: **Guidance on RNA-Sieve usage across diverse data sets.** RNA-Sieve’s accuracy is based on a generative model operating in an asymptotic regime. The mild criteria outlined above guarantee that the data to be deconvolved behaves in accordance with this asymptotic generative model.

| Source                 | Description                   | sc/bulk RNA-seq | Multi-subject | # bulks   | Known truth | Location       |
|------------------------|-------------------------------|-----------------|---------------|-----------|-------------|----------------|
| Tabula Muris Senis     | Many mouse organs             | Both            | Yes           | ~40/organ | No          | GSE13204       |
| Dong et al. (2020)     | Human fibroblasts, cell lines | Both            | No            | 1         | Yes         | GSE136148      |
| Newman et al. (2019)   | Human PBMCs                   | scRNA-seq       | No            | –         | –           | GSE127471      |
| Newman et al. (2019)   | Human PBMCs                   | bulk RNA-seq    | Yes           | 12        | Yes         | GSE127813      |
| 10x Genomics data sets | Human PBMCs                   | scRNA-seq       | Yes           | –         | –           | See link below |
| Monaco et al. (2019)   | Human PBMCs                   | bulk RNA-seq    | Yes           | 12        | Yes         | GSE107011      |
| Xie et al. (2020)      | Human neutrophils             | scRNA-seq       | Yes           | –         | –           | GSE137540      |
| Xin et al. (2016)      | Human pancreatic islets       | scRNA-seq       | Yes           | –         | –           | GSE81608       |
| Fadista et al. (2014)  | Human pancreatic islets       | bulk RNA-seq    | Yes           | 77        | No          | GSE50244       |

Table S4: **Descriptions of data sets used.** Source—original publisher of data; description—species and organs/tissues assayed; sc/bulk RNA-seq—which protocol(s) were used to assay expression; Muti-subject—whether more than one individual was sampled in the data set; *#bulks*—the number of bulk samples, if applicable; Known truth—whether the true cell type proportions were known or experimentally estimated for bulk samples; Location—accession number where data sets can be found. For the PBMC data from 10x Genomics, we used “3k PBMCs from a healthy donor” and “4k PBMCs from a healthy donor” accessed at <https://support.10xgenomics.com/single-cell-gene-expression/datasets>.



### S3 Supplementary Figures

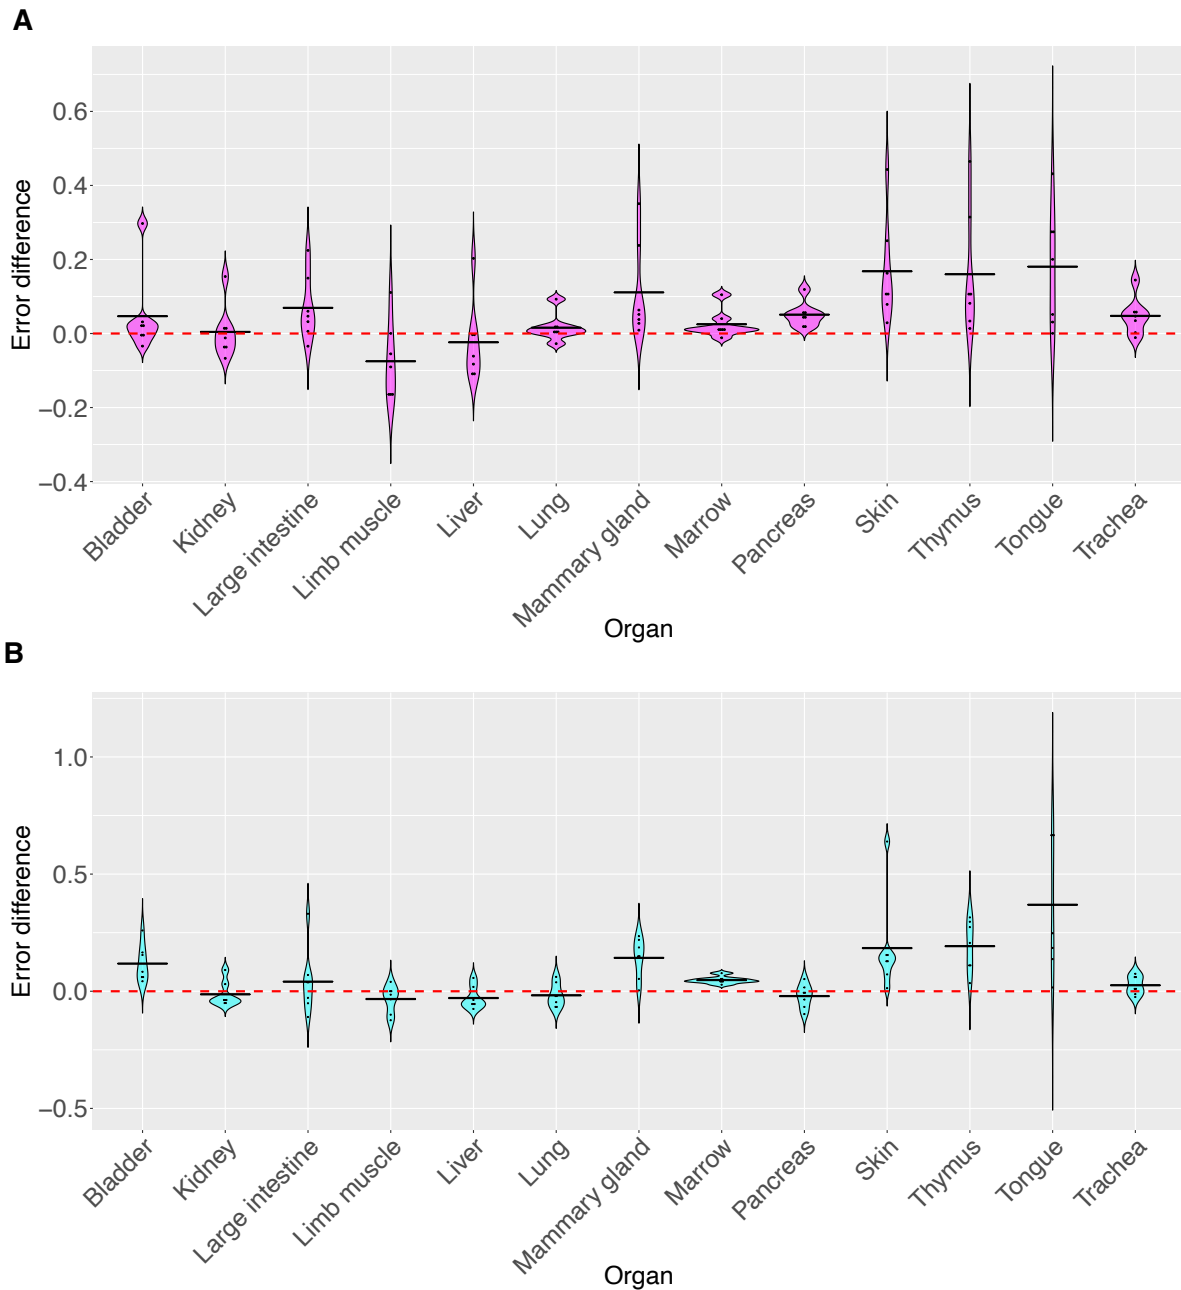

Figure S1: **Comparison of other methods to RNA-Sieve across 13 murine organs.** Pseudobulk experiments were performed in 13 different organs using data from the *Tabula Muris Senis* experiment. Errors were computed as the average  $L_1$  error across cell types in each organ. For each organ, the difference in errors was computed between other methods and RNA-Sieve. **A:** Smart-seq2 reference, 10x Chromium pseudobulk; **B:** 10x Chromium pseudobulk, Smart-seq2 pseudobulk. Horizontal black bars correspond to the mean difference in error, and positive values indicate better comparative performance for RNA-Sieve.

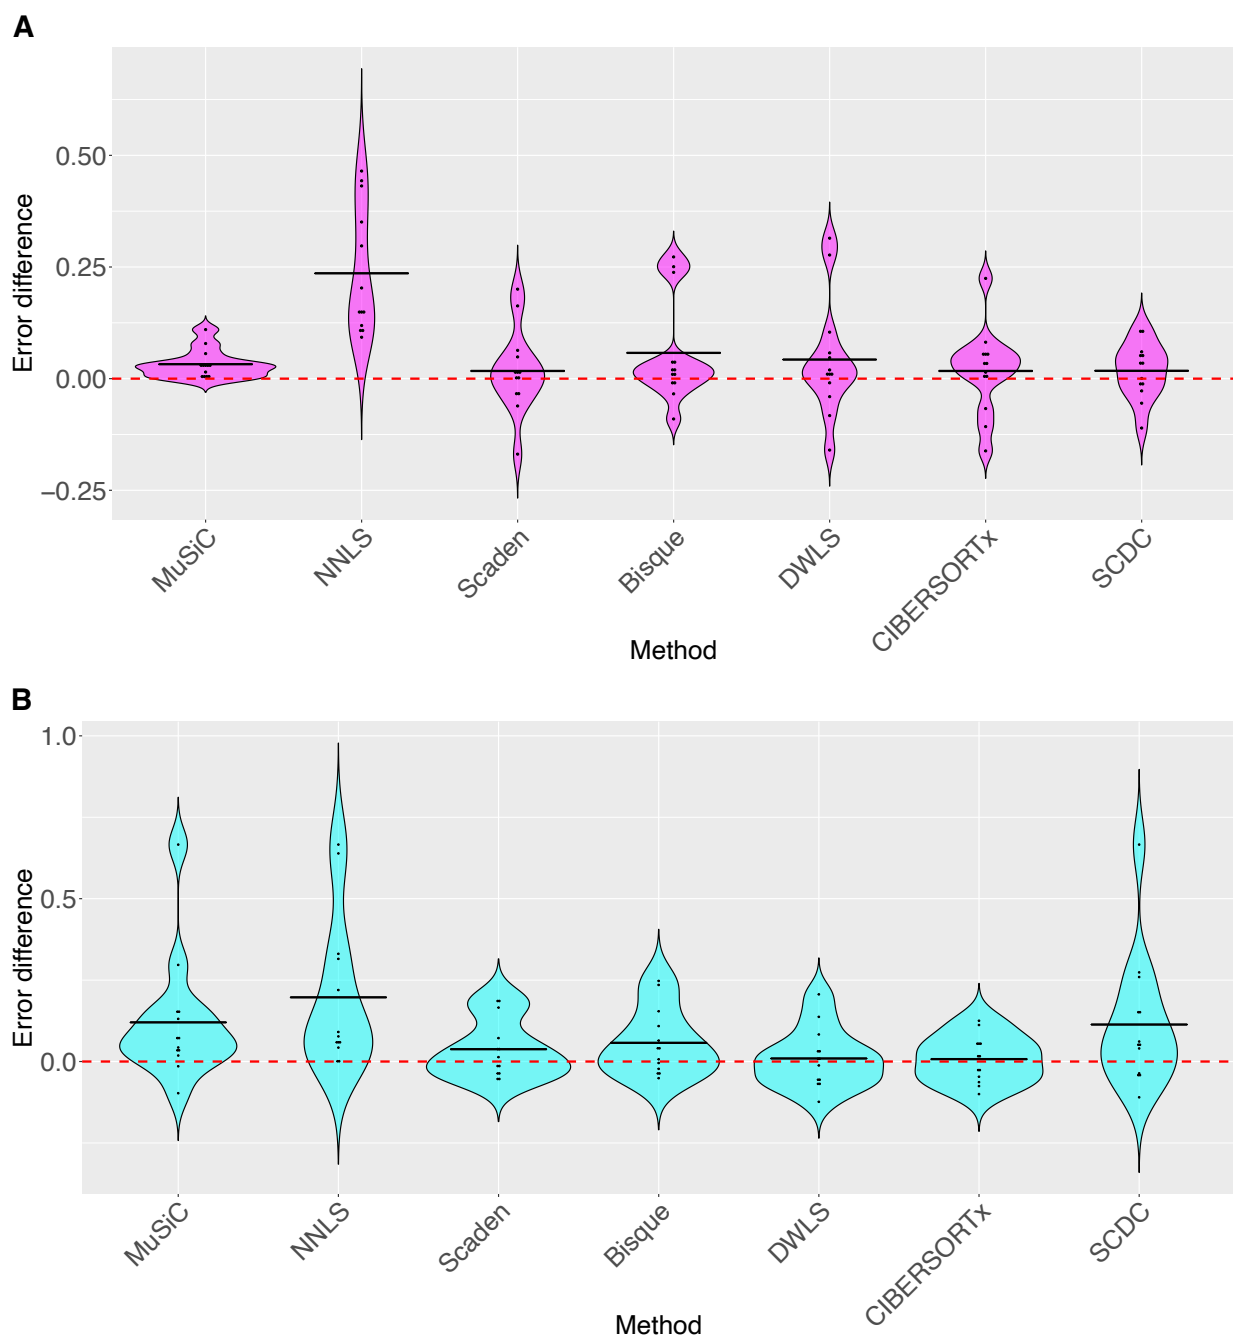

Figure S2: **Direct comparison of other methods to RNA-Sieve** Pseudobulk experiments were performed in 13 different organs using data from the *Tabula Muris Senis* experiment. Errors were computed as the average  $L_1$  error across cell types in each organ. For each method, the difference in errors was computed between it and RNA-Sieve across each of the 13 organs. **A**: Smart-seq2 reference, 10x Chromium pseudobulk; **B**: 10x Chromium pseudobulk, Smart-seq2 pseudobulk. Horizontal black bars correspond to the mean difference in error, and positive values indicate better comparative performance for RNA-Sieve.

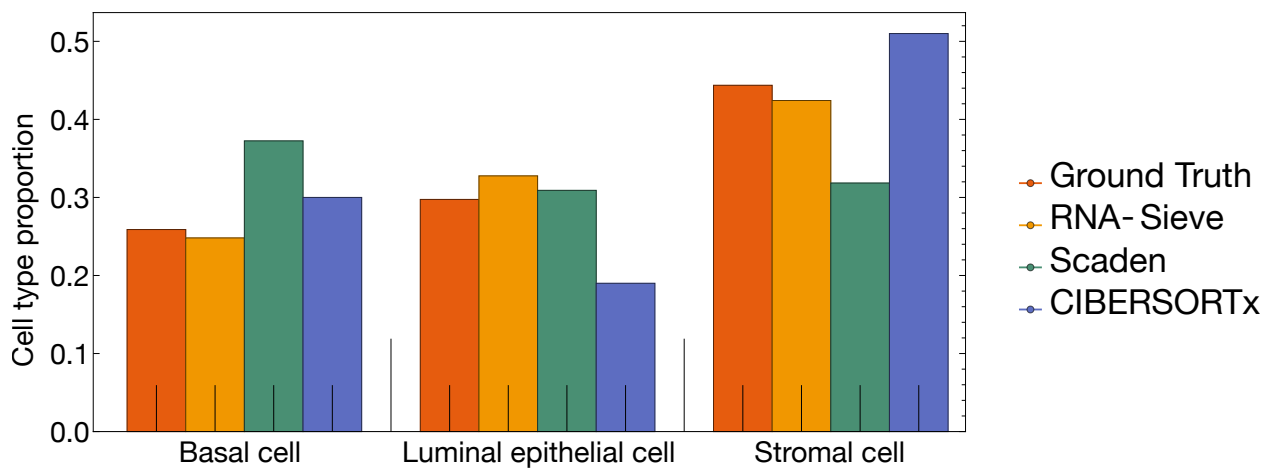

Figure S3: **Minor per-cell-type differences may result in major individual-cell-type deviations.** The average improvement of RNA-Sieve artificially appears minor because of our chosen error metric (average deviation from the true values) and averaging across cell types. This can be seen in the above (real) example of deconvolving a 10x mammmary gland bulk from a Smart-seq2 reference in which RNA-Sieve (0.02), Scaden (0.08), and CIBERSORTx (0.07) may appear to perform similarly when only the raw error values are compared. However, closer inspection reveals that Scaden and CIBERSORTx exhibit large errors for some cell types whereas RNA-Sieve does not.

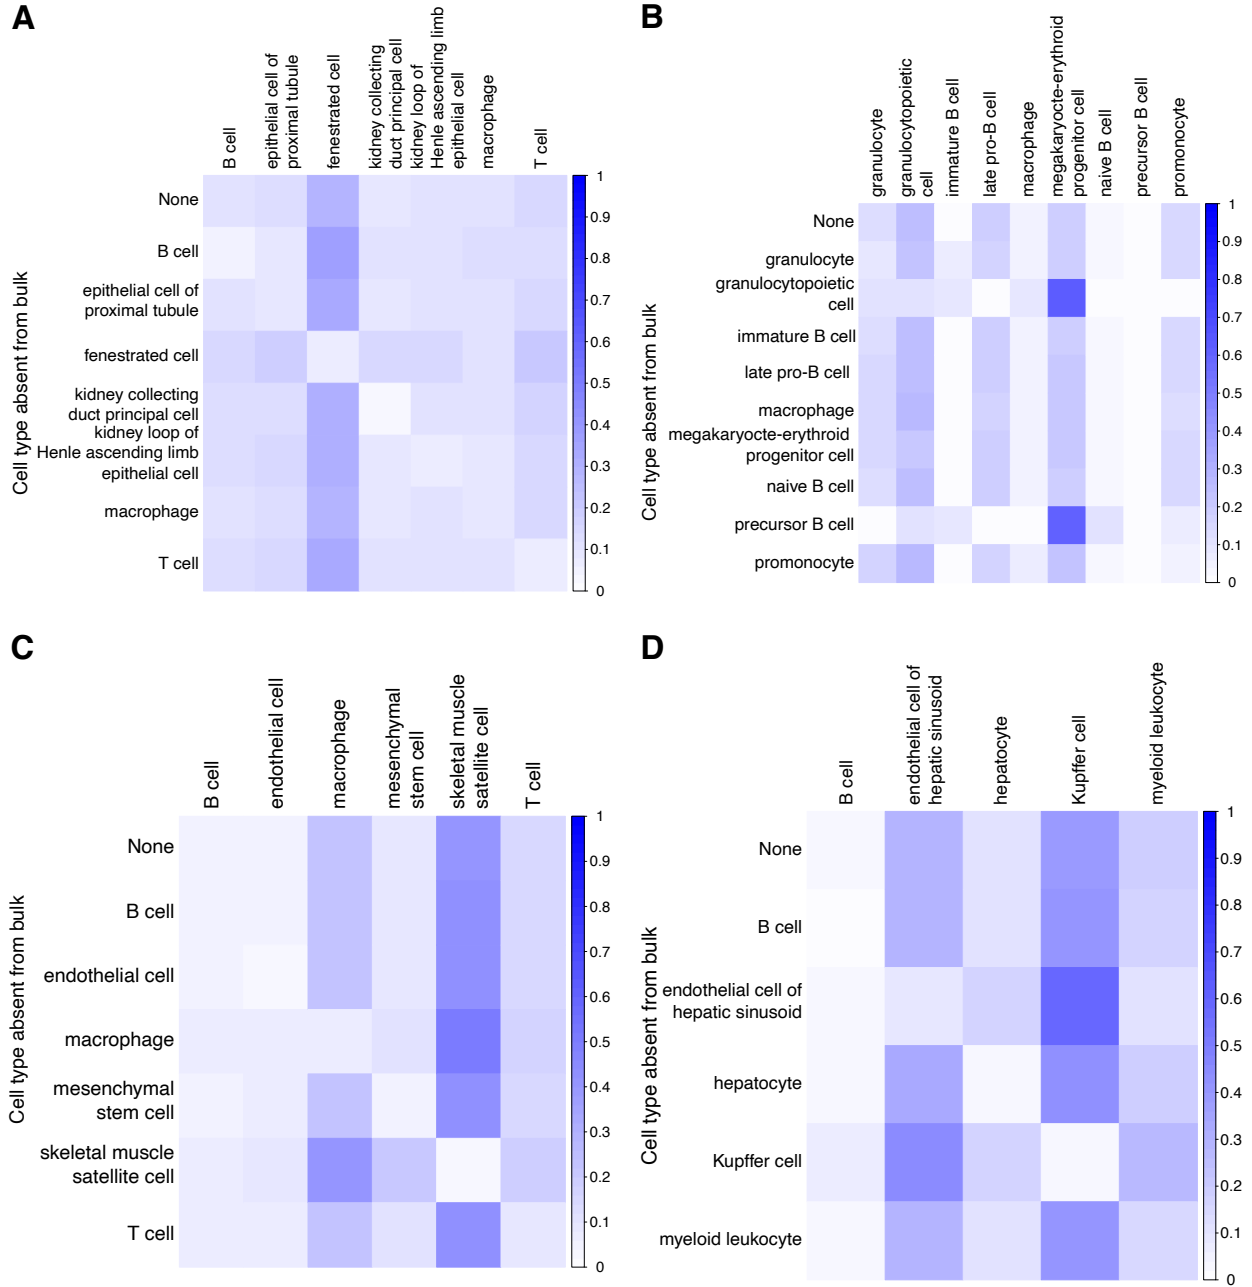

Figure S4: **Deconvolution with extra cell types in the reference matrix.** Deconvolution was performed in pseudobulk experiments in four different organs (**A** – Kidney; **B** – Marrow; **C** – Limb muscle; **D** – Liver) from the *Tabula Muris Senis*. For each organ, we followed a leave-one-out procedure in which one cell type is removed from the pseudobulk at a time. Deconvolution was then performed with this extra cell type in the reference in order to examine RNA-Sieve’s specificity. The top row shows the inferred proportions with no extra reference cell types. Darker colors indicate a higher estimated proportion value. Here we used Smart-seq2 data for the references and 10x Chromium for the pseudobulks.

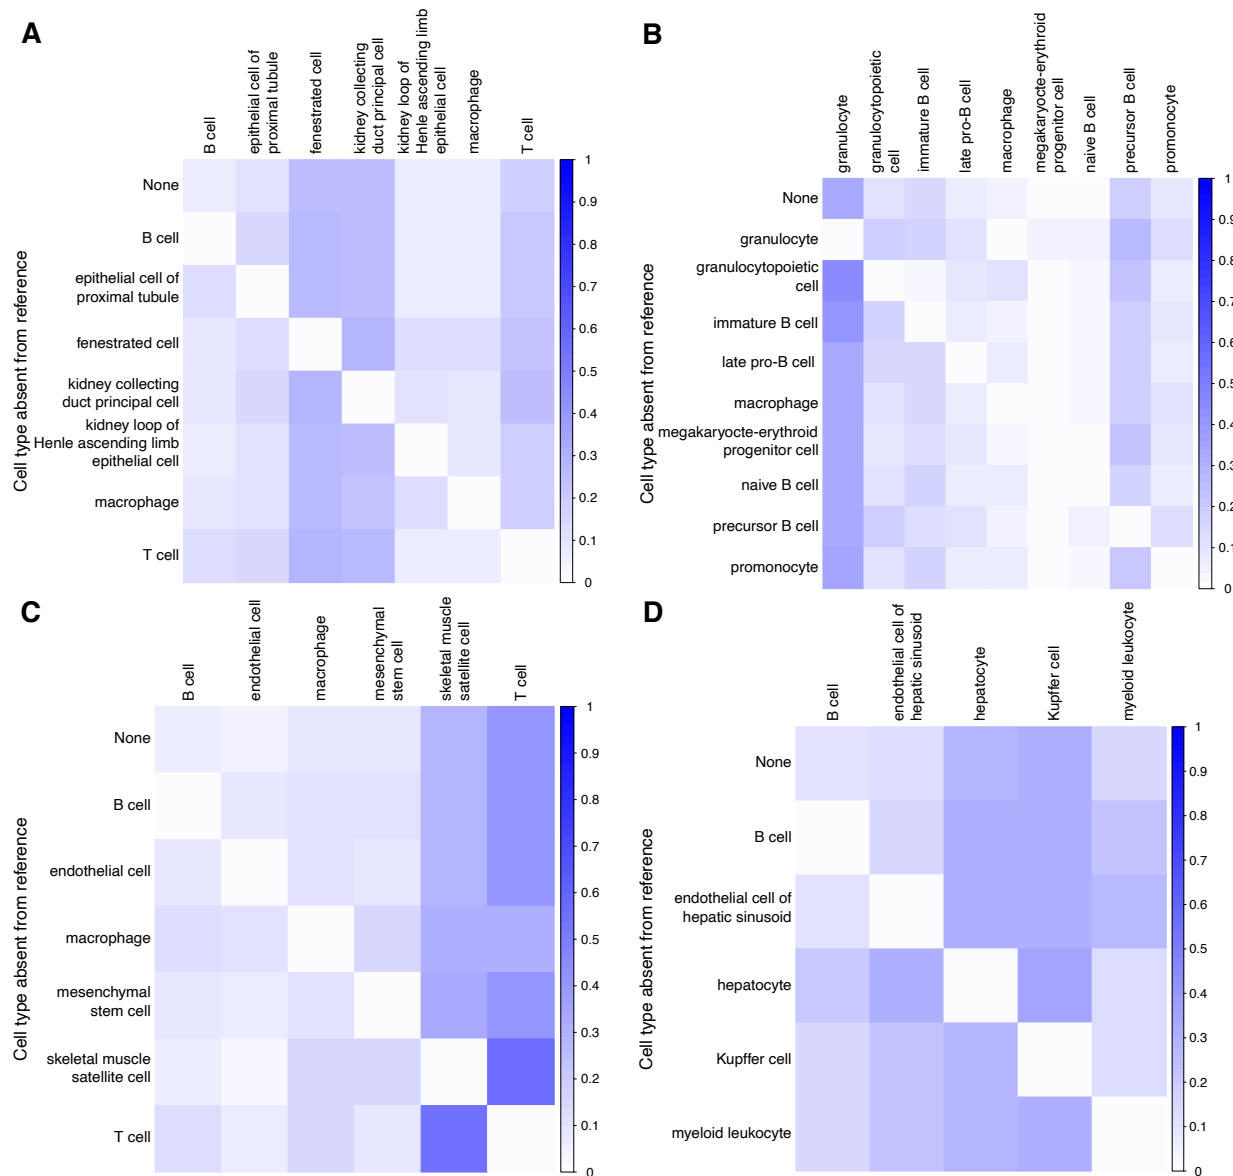

**Figure S5: Deconvolution with extra cell types in the reference matrix.** Deconvolution was performed in pseudobulk experiments in four different organs (**A** – Kidney; **B** – Marrow; **C** – Limb muscle; **D** – Liver). For each organ, we followed a leave-one-out procedure in which one cell type is removed from the pseudobulk at a time. Deconvolution was then performed with this extra cell type in the reference in order to examine RNA-Sieve’s specificity. The top row shows the inferred proportions with no extra reference cell types. Darker colors indicate a higher estimated proportion value. Here we used 10x Chromium data for the reference and Smart-seq2 for the pseudobulk.

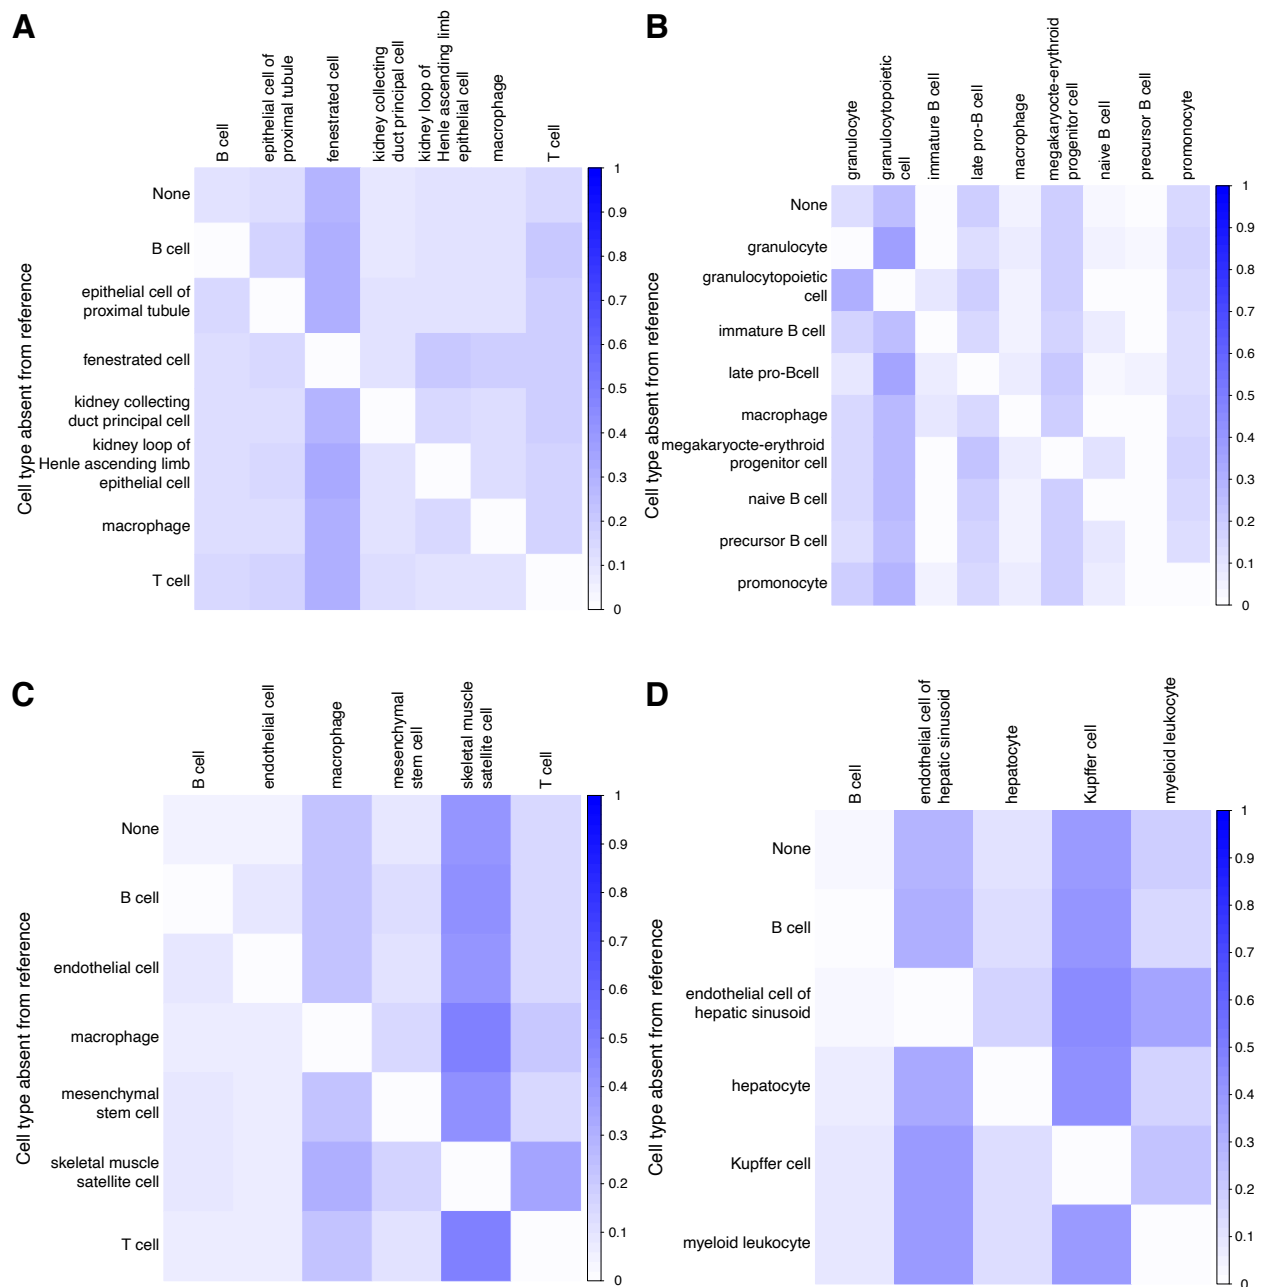

Figure S6: **Deconvolution with missing cell types in the reference matrix.** Deconvolution was performed in pseudobulk experiments in four different organs from the *Tabula Muris Senis* (**A** – Kidney; **B** – Marrow; **C** – Limb muscle; **D** – Liver). For each organ, we followed a leave-one-out procedure in which one cell type is removed from the reference at a time. Deconvolution was then performed with an extra cell type in the pseudobulk in order to examine RNA-Sieve’s ability to handle such a misspecification. The top row shows the inferred proportions with no missing reference cell types. Darker colors indicate a higher estimated proportion value. Here we used Smart-seq2 data for the reference and 10x Chromium for the pseudobulk.

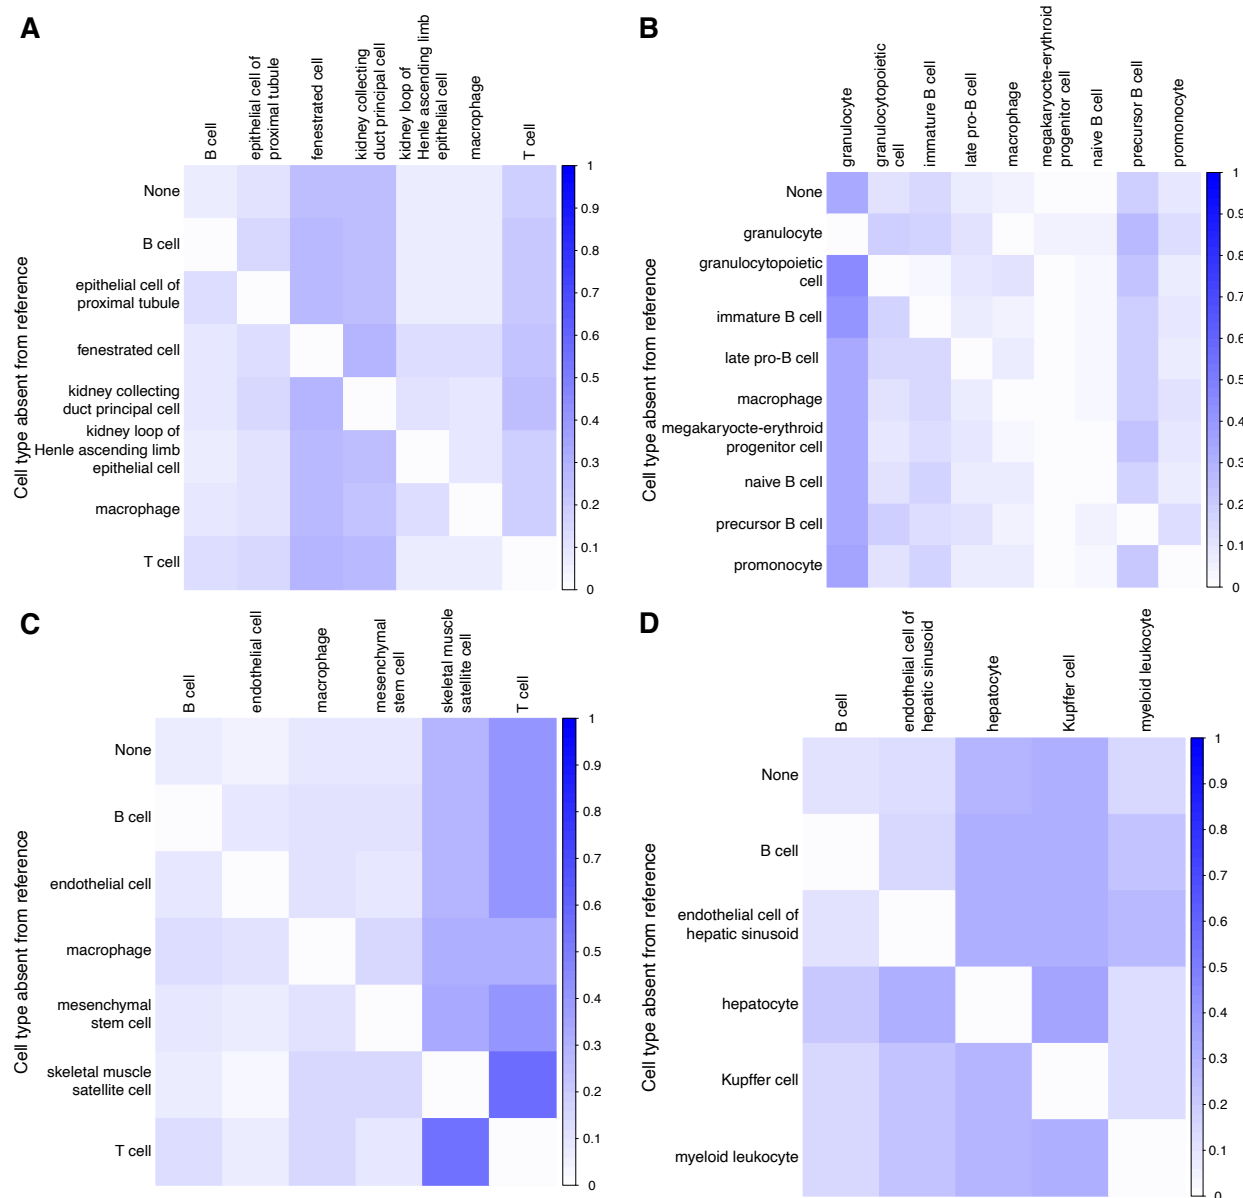

**Figure S7: Deconvolution with missing cell types in the reference matrix.** Deconvolution was performed in pseudobulk experiments in four different organs (**A** – Kidney; **B** – Marrow; **C** – Limb muscle; **D** – Liver). For each organ, we followed a leave-one-out procedure in which one cell type is removed from the reference at a time. Deconvolution was then performed with an extra cell type in the pseudobulk in order to examine RNA-Sieve’s ability to handle such a misspecification. The top row shows the inferred proportions with no missing reference cell types. Darker colors indicate a higher estimated proportion value. Here we used 10x Chromium data for the reference and Smart-seq2 for the pseudobulk.

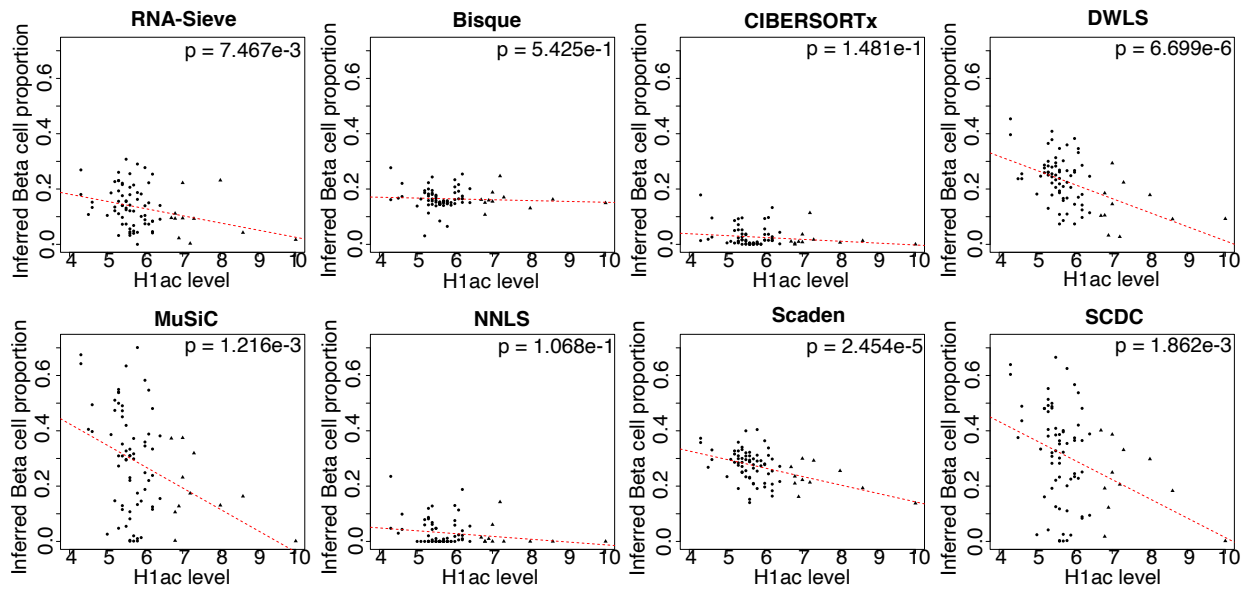

Figure S8: **Deconvolution results on validation data.** Single-cell expression data in pancreatic islets from Xin et al. (2016) was used as reference to deconvolve bulk RNA-seq data from Fadista et al. (2014). Each point represents the estimated beta pancreatic islet cell proportion one of 77 bulks with recorded HbA1c levels. The  $p$ -value is for a univariate regression on the estimated proportions. Circles correspond to healthy samples while triangles represent samples from diabetic patients.



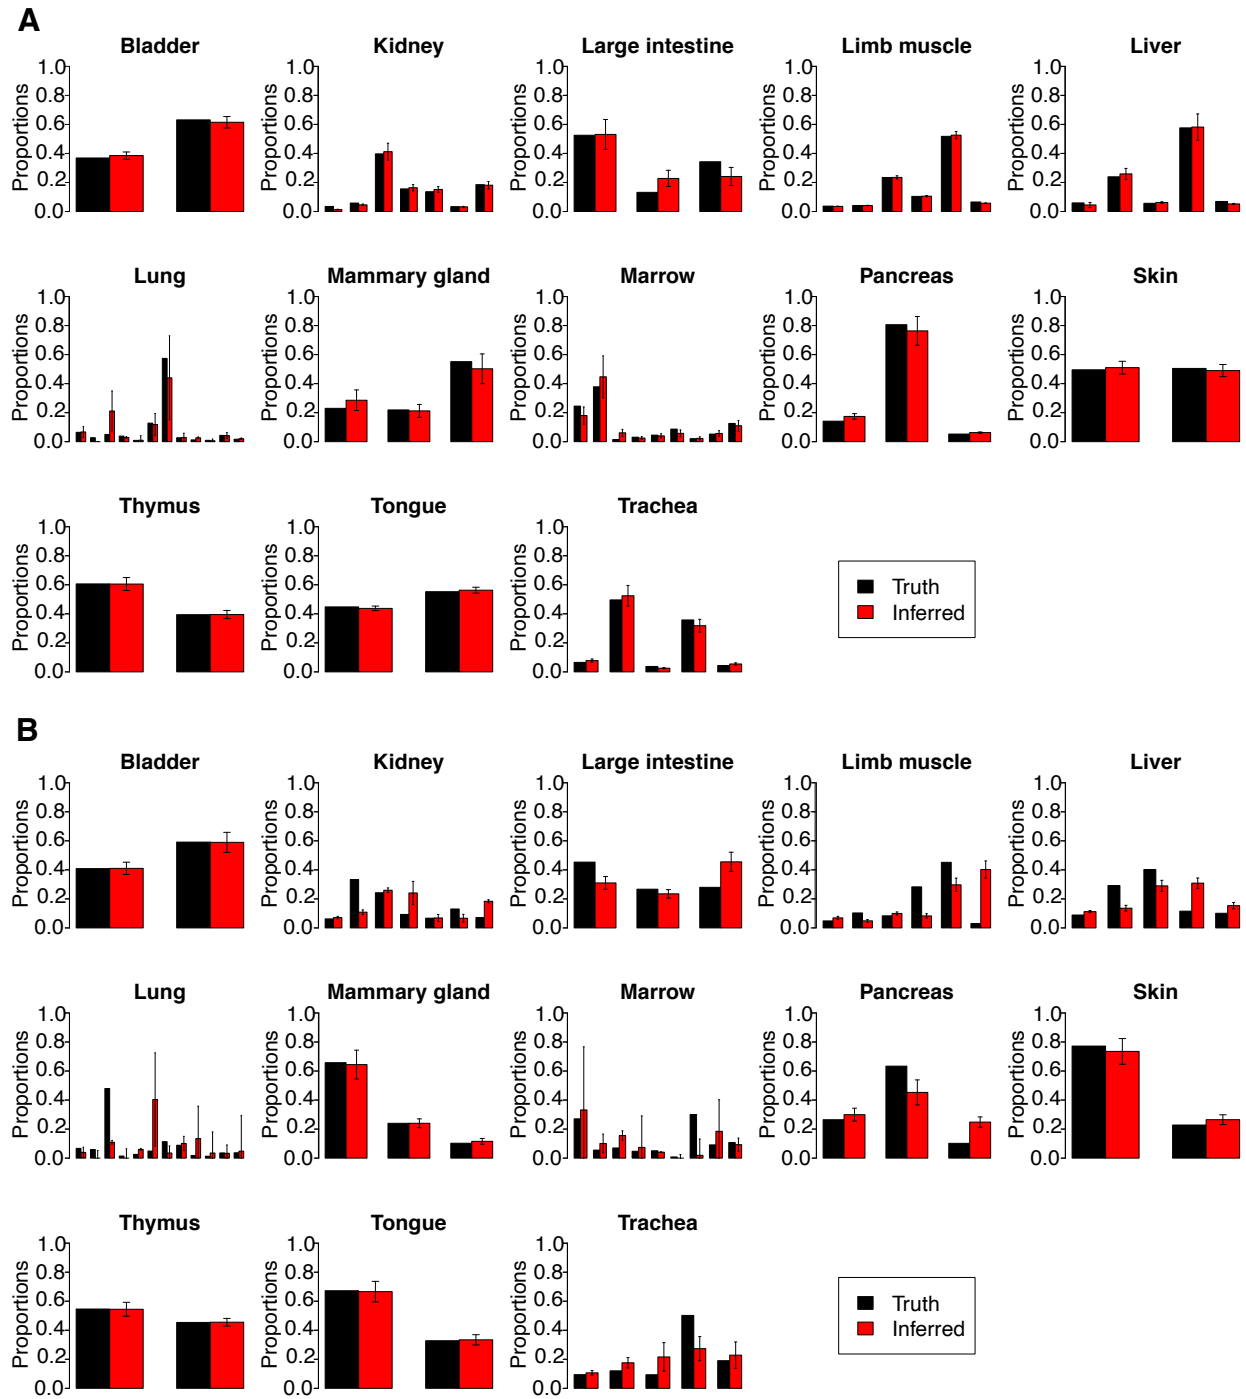

Figure S9: **RNA-Sieve results with confidence intervals in pseudobulk experiments.** Inferred cell type proportions in pseudobulk experiments using data from the *Tabula Muris Senis* experiment. **A:** Within-protocol, both reference and pseudobulks of 10x Chromium data; **B:** Across-protocol, 10x Chromium reference and Smart-seq2 pseudobulk. The black error bars on inferred proportions show the marginal 95% confidence intervals as computed from the empirical Godambe information produced by RNA-Sieve. Table S2 contains the cell types in each organ, which could not be displayed because of space constraints.

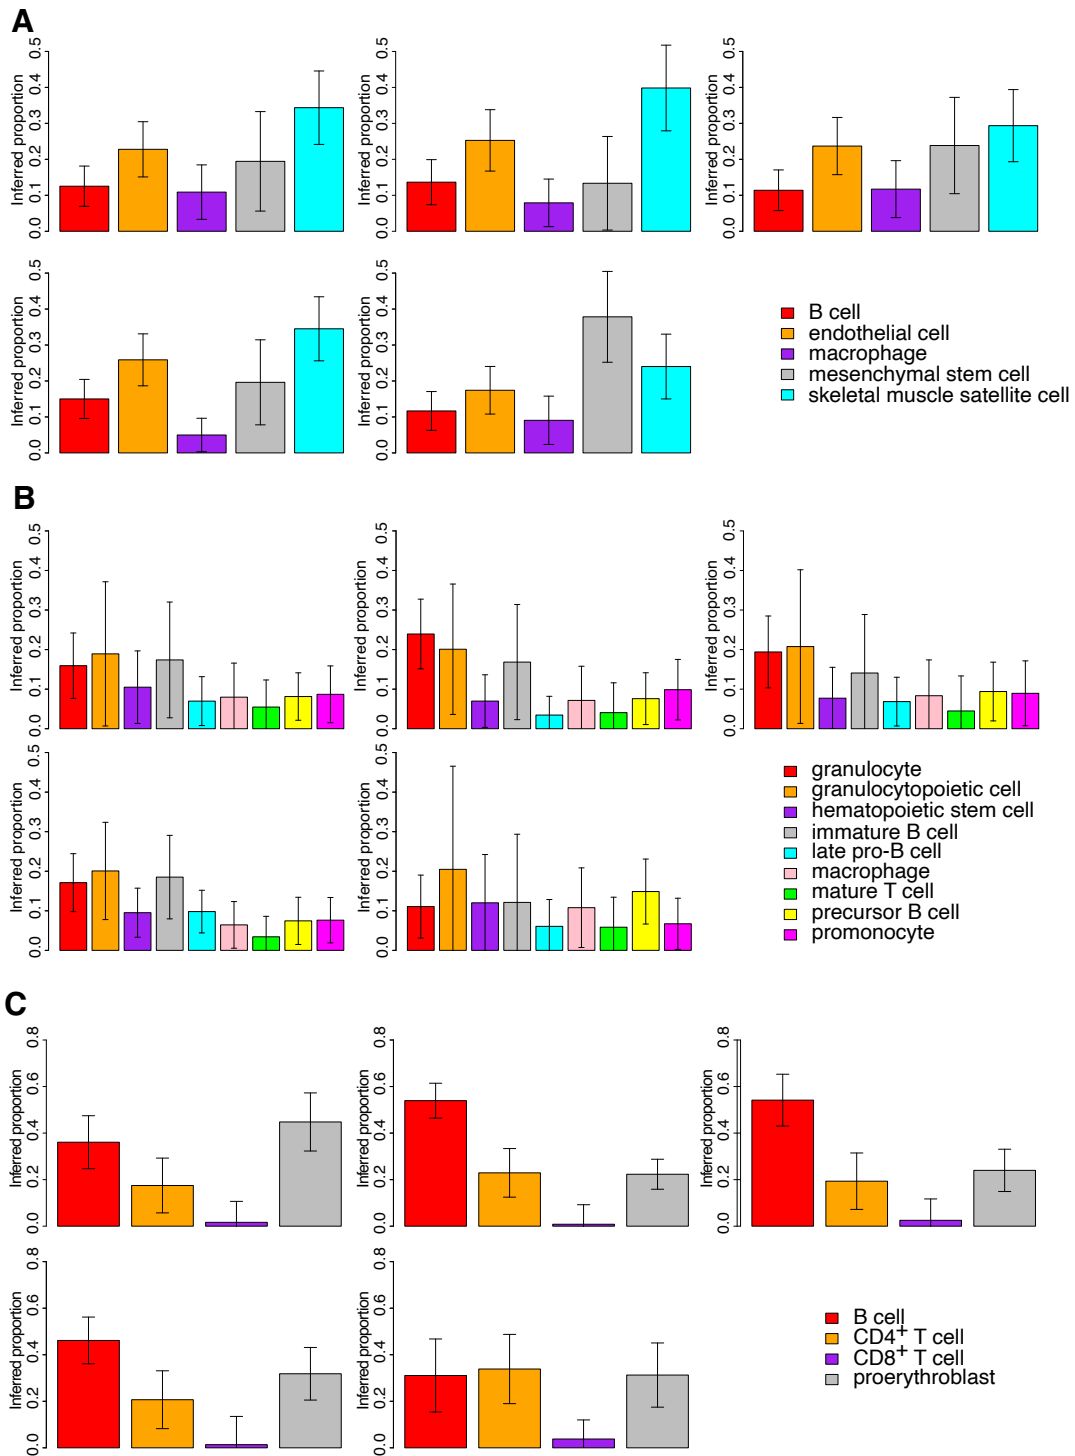

Figure S10: **Confidence intervals with real bulk samples** **A**–Limb muscle; **B**–Marrow; **C**–Spleen. For all of each organ’s samples, we produced estimated cell type proportions with 95% confidence intervals using RNA-Sieve. Smart-seq2 data were used as the reference. Here we present five randomly chosen samples for each organ (out of  $\sim 40$ ); histograms showing the typical radii are displayed in Figure S11.

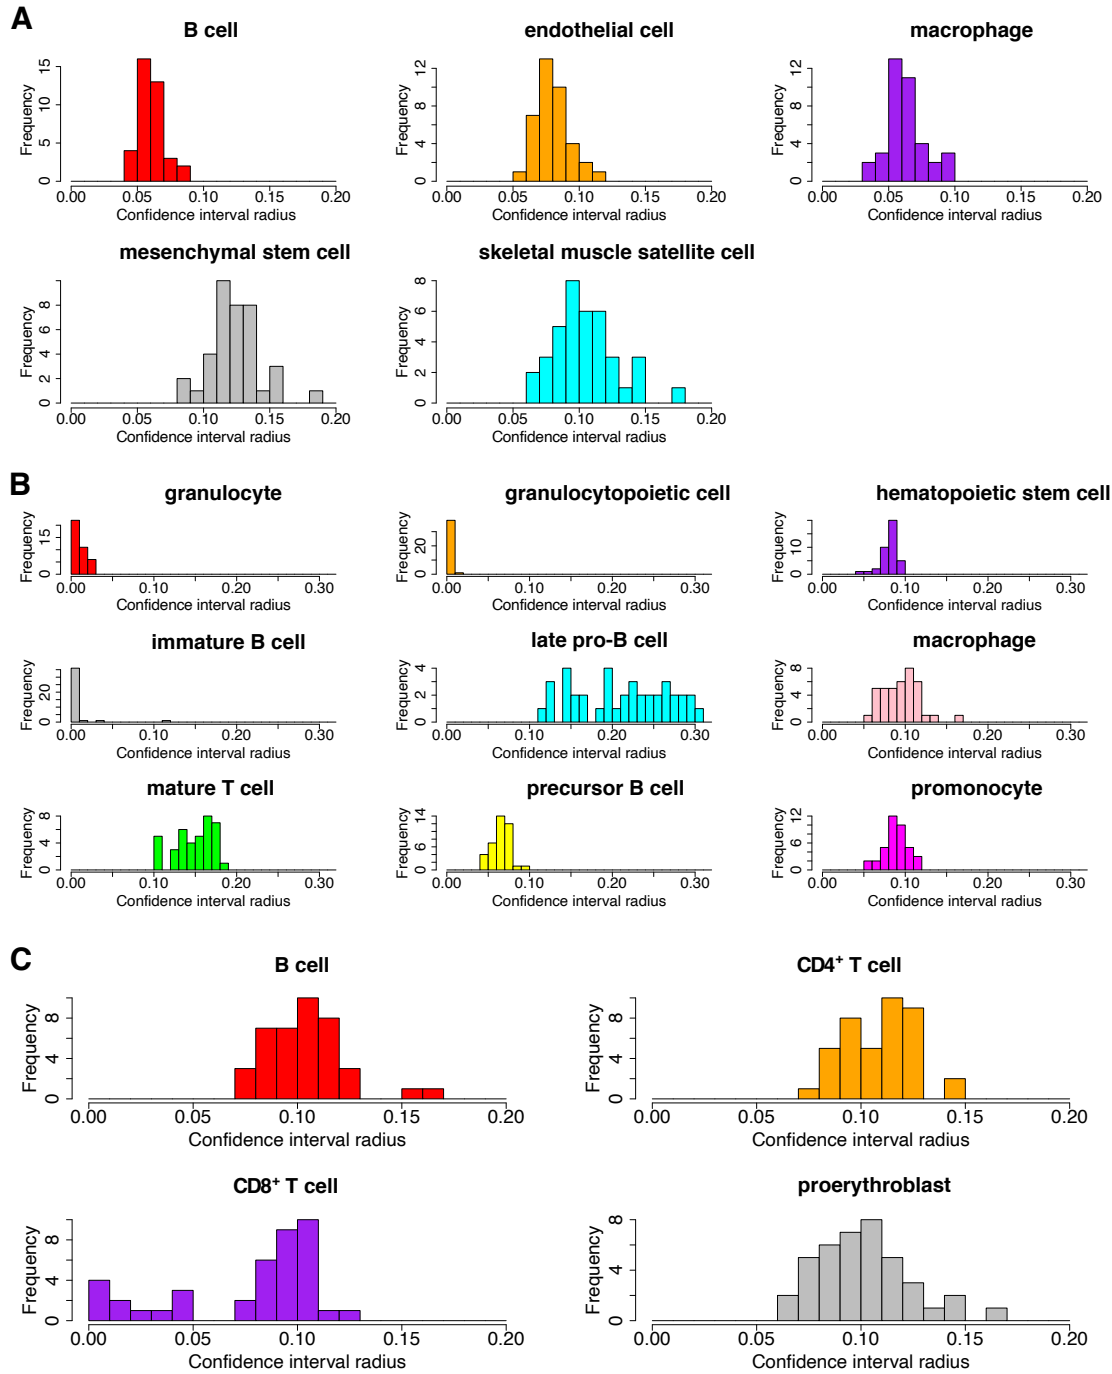

Figure S11: **Histograms of CI radii with real bulk samples.** The radius of the 95% confidence interval for inferred cell type proportions was computed using RNA-Sieve for each real bulk sample in the listed organs ( $\sim 40$  per organ). **A**–Limb muscle; **B**–Marrow; **C**–Spleen.

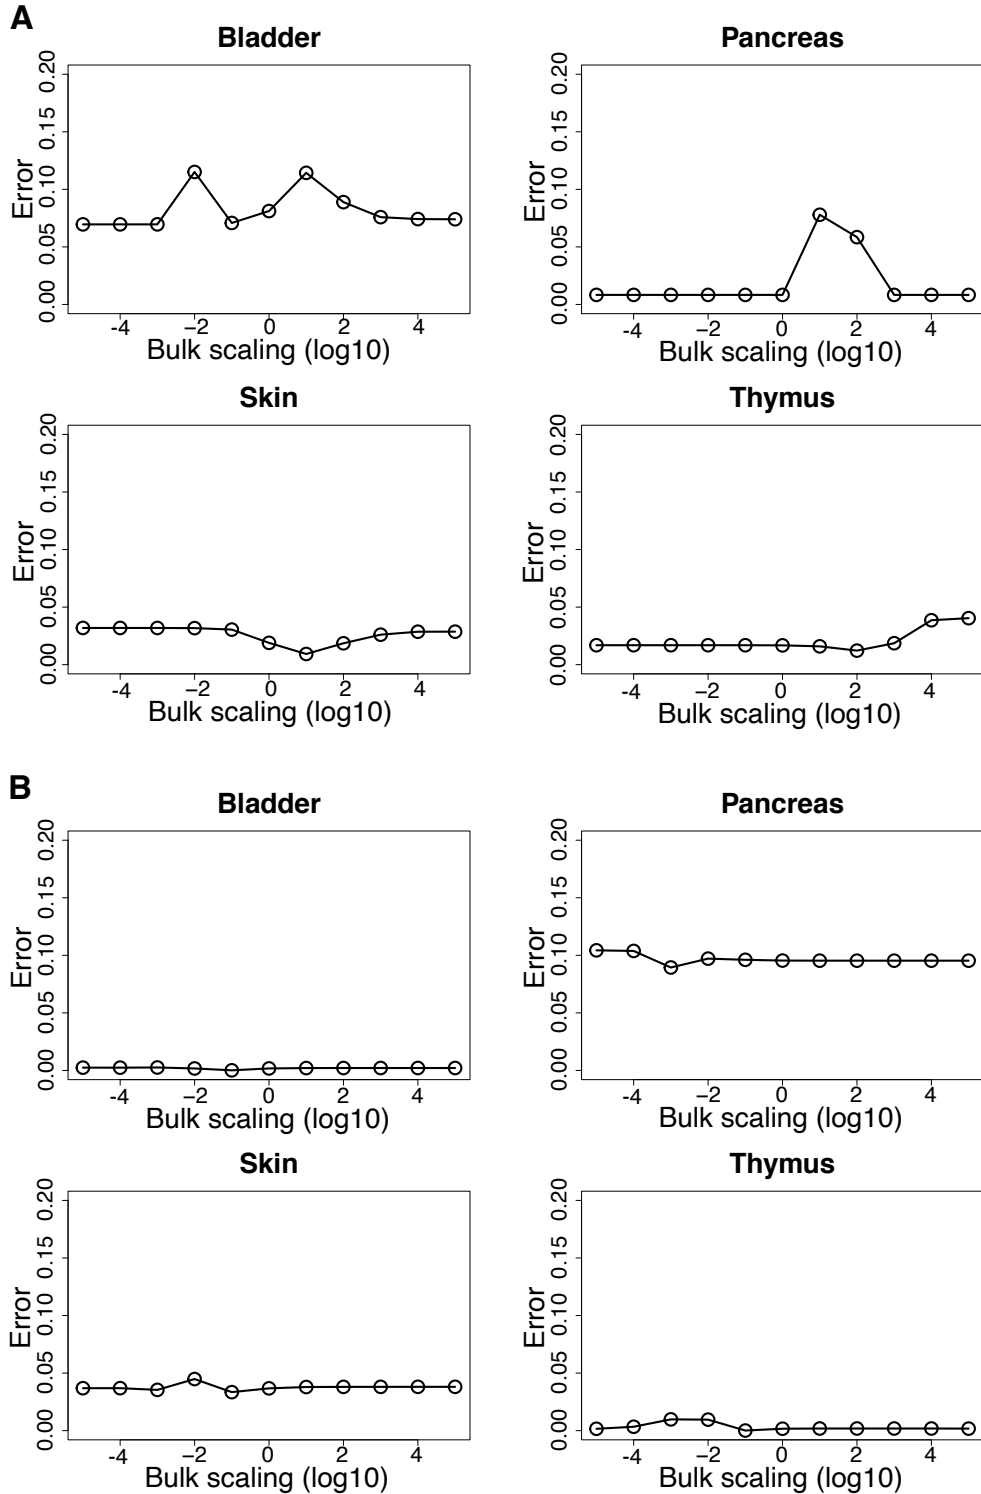

Figure S12: **Effects of different bulk scalings.** To determine RNA-Sieve’s sensitivity to the the application of different scalings to bulk samples, we multiplied pseudobulk counts by different values across a wide range and performed deconvolution. We then computed RNA-Sieve’s error for each value. Here we show representative results from four organs. **A**–Smart-seq2 reference, 10x Chromium pseudobulk; **B**–10x Chromium reference, Smart-seq2 pseudobulk.
